# Supplementary material
Source: PubMed Central journal article supplement (PMC6707924)
Supplement: JB.00059-19-s0001.pdf [file JB.00059-19-s0001.pdf]

***Pseudomonas aeruginosa* requires the DNA-specific endonuclease EndA to degrade eDNA to  
disperse from the biofilm**

Kathryn E. Cherny and Karin Sauer#

**SUPPLEMENTARY INFORMATION**

Figure S1

Page 2

Figure S2

Page 3

Figure S3

Page 4

### Dispersion induced with glutamate

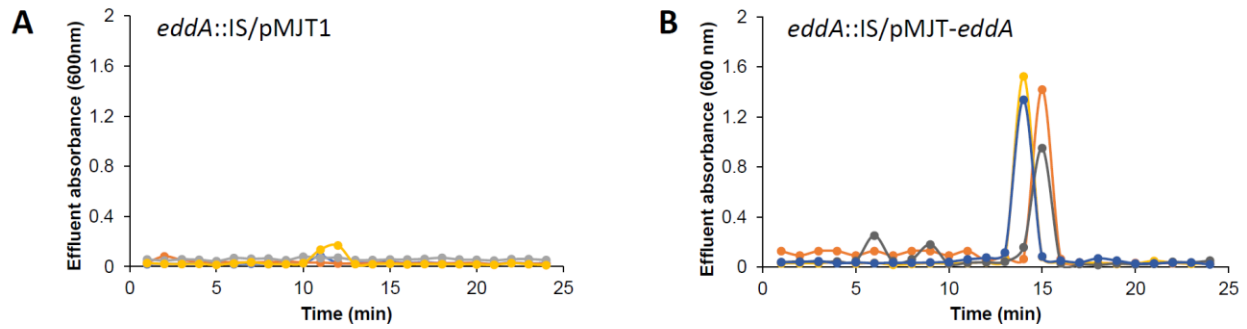

### Dispersion induced with NO

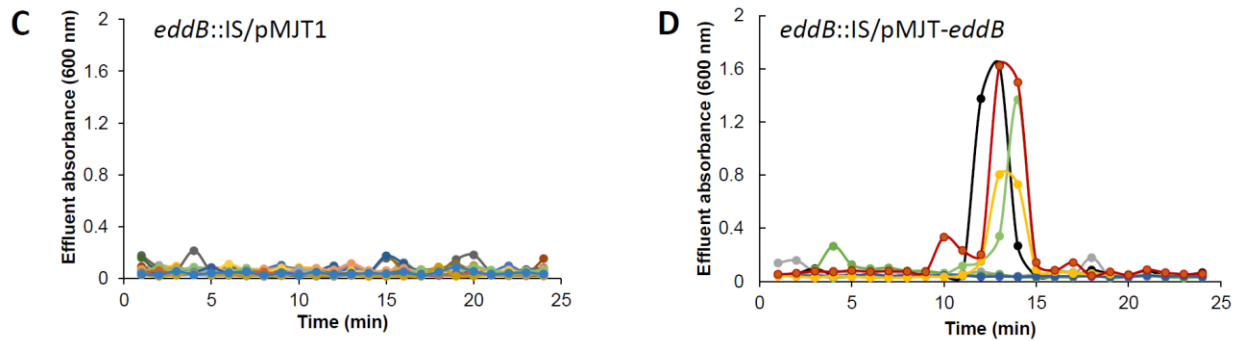

**Figure S1. Multi-copy expression of *eddA* and *eddB* in *eddA::IS* and *eddB::IS* mutant strains, respectively, restore the dispersion response to wild-type levels.** Biofilms were grown for 5 days in 5-fold diluted VBMM in tube reactors supplemented with carbenicillin for plasmid maintenance and 0.1% arabinose to ensure expression of *eddA* and *eddB*, respectively. Dispersion was induced the addition of glutamate or nitric oxide (NO) to the growth medium. Representative dispersion profiles in response to glutamate are shown for (A) *eddA::IS/pMJT1*, (B) *eddA::IS/pMJT-eddA*, and in response to NO for (C) *eddB::IS/pMJT1*, and (D) *eddB::IS/pMJT-eddB*. Dispersion assays were performed in triplicate consisting of at least 4 technical replicates.

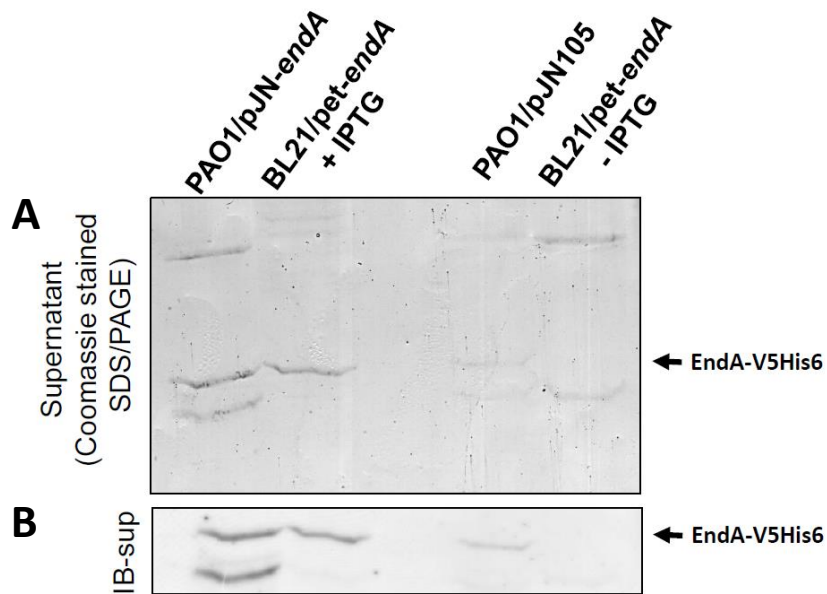

**Figure S2. Confirmation of EndA being secreted by *P. aeruginosa* and *E. coli*.** Culture supernatants were obtained from *P. aeruginosa* PAO1/pJN105 and PAO1/pJN-*endA*-V5/6xHis cells grown planktonic to exponential phase and post arabinose induction, and from *E. coli* BL21/*pet-endA*-V5/6xHis grown in the absence and presence of IPTG. (A) Image of Coomassie stained SDS-gel. A total of 1.5  $\mu$ g of concentrated supernatant was loaded. (B) Image of immunoblot probed for the presence of V5/6xHis-tagged EndA using anti-V5 antibodies. A total of 1.5  $\mu$ g of concentrated supernatant protein was transferred for immunoblot analysis.

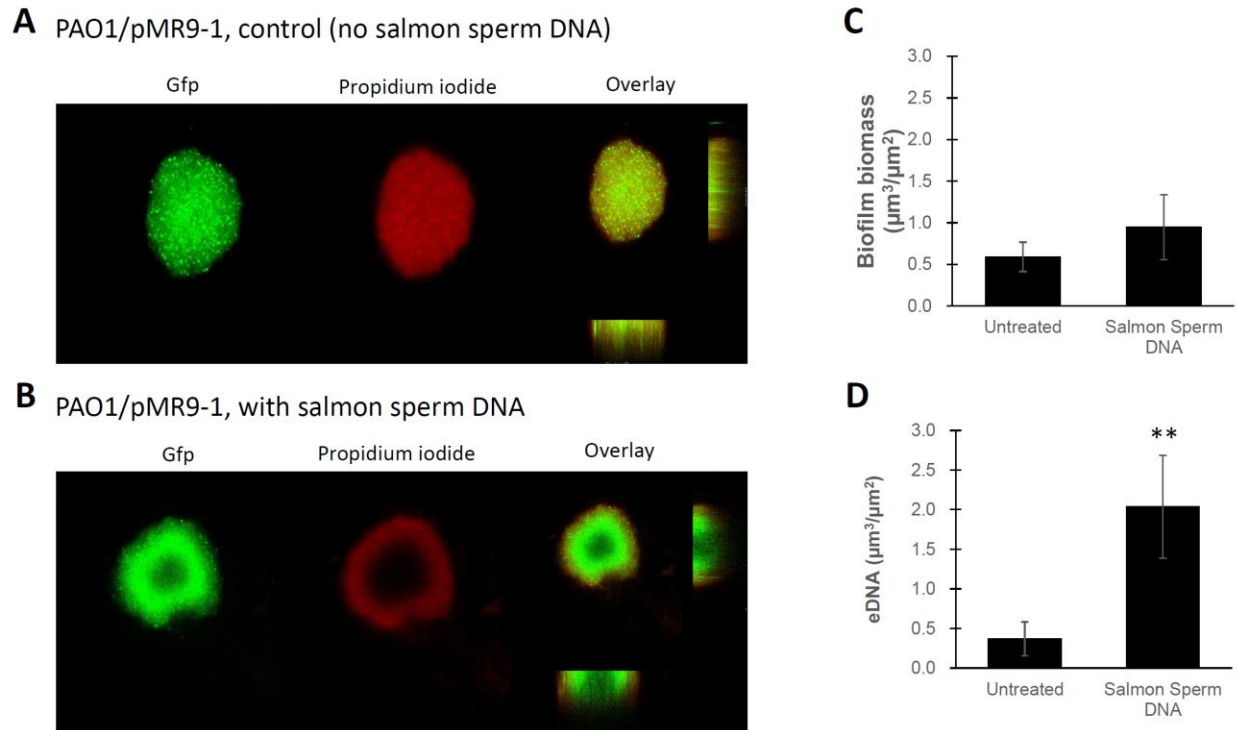

**Figure S3. Visualization and quantitation of eDNA present in biofilms.** (A) Representative images of flow-cell grown *P. aeruginosa* PAO1/pMRP9-1 biofilms constitutively expressing *gfp* following 2 days of growth in 24-well plates under static conditions with media changes every 12 h. The biofilm biomass was visualized by *Gfp*. eDNA was visualized following staining with propidium iodide. White bar, 100  $\mu\text{m}$ . (B) Representative images of biofilms by PAO1/pMRP9-1 following 2 days of growth in 24-well plates under static conditions with media changes every 12 h following exposure to exogenous salmon sperm DNA (5 mg/ml). The biofilm biomass was visualized by *Gfp*, while eDNA was visualized following staining with propidium iodide. White bar, 100  $\mu\text{m}$ . (C) Quantitative analysis of the biofilm biomass in the absence and presence of exogenous salmon sperm DNA using COMSTAT. (D) Quantitative analysis of the biofilm-associated eDNA in the absence and presence of exogenous salmon sperm DNA using COMSTAT. Experiments were performed in triplicates, with each repeat comprising 6 technical replicates. Error bars represent standard deviation. \*\*, significantly different compared to PAO1/pJN105 ( $<0.005$ ) as determined using ANOVA.
